# Supplementary material
Source: PubMed Central journal article supplement (PMC4318623)
Supplement: ac504175h_si_001.pdf [file ac504175h_si_001.pdf]

# Using DNA Aptamer Probe for Immunostaining of Cancer Frozen Tissues

Ying Pu<sup>1</sup>, Zhenxu Liu<sup>1</sup>, Yi Lu<sup>1</sup>, Peng Yuan<sup>1</sup>, Jun Liu<sup>1</sup>, Bo Yu<sup>1</sup>, Guodong Wang<sup>1</sup>,

Chaoyong James Yang<sup>3</sup>, Huixia Liu<sup>1a\*</sup> and Weihong Tan<sup>2,4b\*</sup>

1. Xiangya Hospital, Central South University, Changsha, Hunan, 410008, China
2. Molecular Science and Biomedicine Laboratory, State Key Laboratory for Chemo/Bio-Sensing and Chemometrics, College of Chemistry and Chemical Engineering, College of Biology, and Collaborative Research Center of Molecular Engineering for Theranostics, Hunan University, Changsha 410082, China
3. State Key Laboratory for Physical Chemistry of Solid Surfaces, Key Laboratory for Chemical Biology of Fujian Province, Key Laboratory of Analytical Chemistry, and Department of Chemical Biology, College of Chemistry and Chemical Engineering, Xiamen University, Xiamen, 361005, China
4. Department of Chemistry and Physiology and Functional Genomics, Center for Research at the Bio/Nano Interface, Shands Cancer Center, University of Florida, Gainesville, FL 32611-7200, USA

\* Correspondence authors:

E-mail: [lhx900@aliyun.com](mailto:lhx900@aliyun.com) and [tan@chem.ufl.edu](mailto:tan@chem.ufl.edu)

## Supporting Information

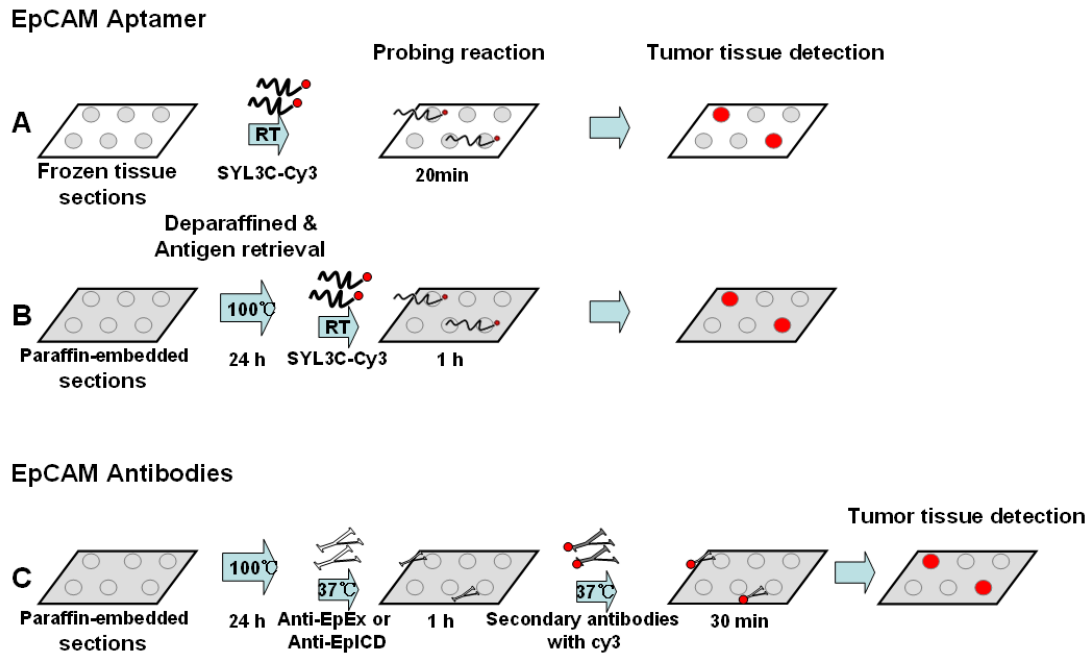

**Figure S1. Tissue immunostaining with the EpCAM aptamer probe or EpCAM antibodies** Paraffin-embedded tissue sections require antigen retrieval at 100°C for 24h, while no such preparation is required for frozen sections. A) Frozen tissue sections were probed with the synthetic EpCAM Aptamer SYL3C-CY3 for 20min at RT (room temperature); B) Paraffin-embedded tissue sections were probed with EpCAM Aptamer for 1h at RT; C) Paraffin-embedded tissue sections were probed with EpCAM antibody (EpEX or EpICD) for 1h at 37°C, followed by one more incubation with secondary antibody for another 30min.

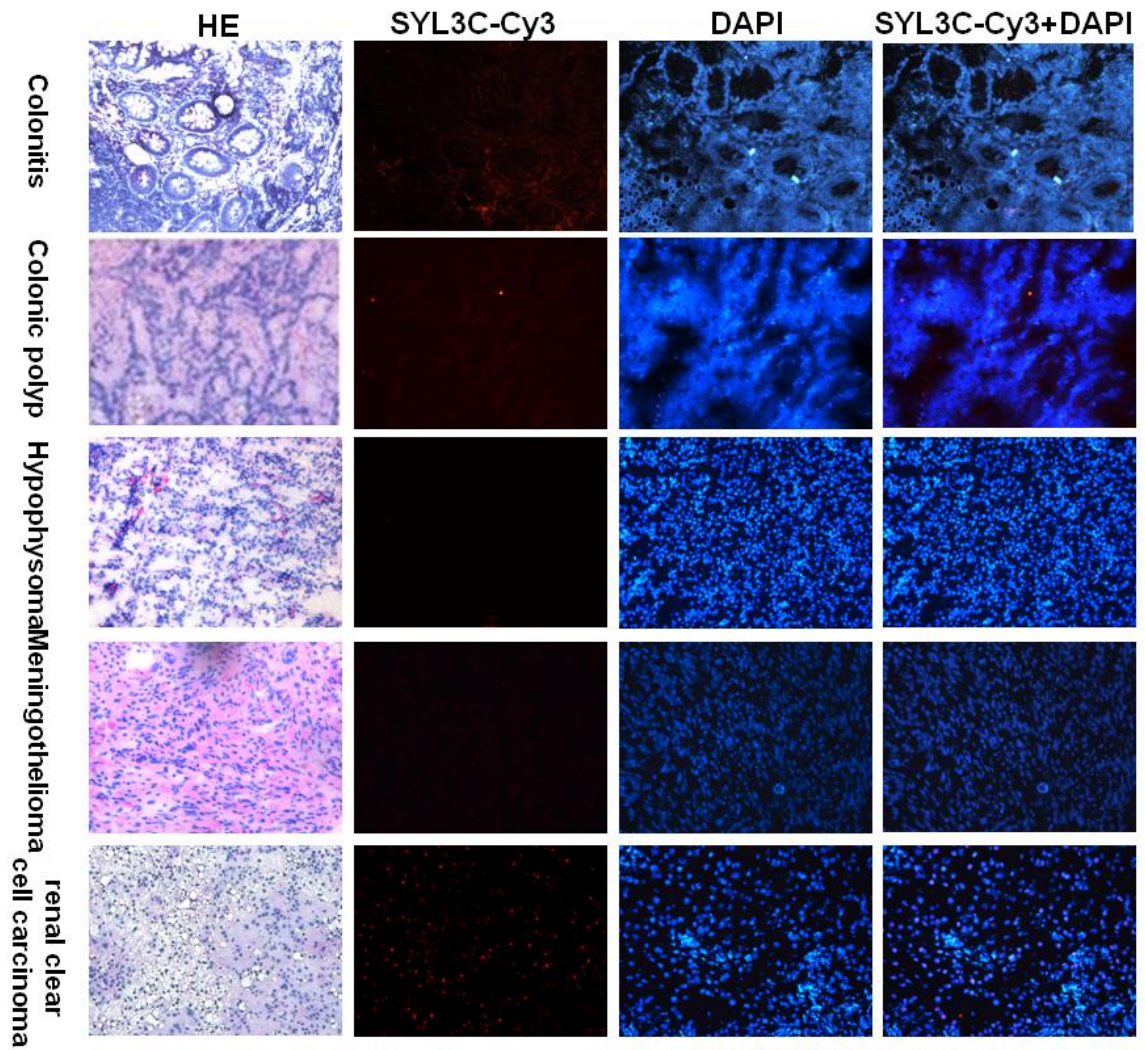

**Figure S2. Frozen tissue immunostaining of benign lesion of colon and EpCAM-negative malignant tumors by EpCAM Aptamer SYL3C-CY3. All images were taken using a light microscope with  $\times 200$  magnification.**
